# Supplementary material for: Enhanced near infrared-to-visible upconversion in the CaTiO 3 :Yb 3+ /Er 3+ phosphor via the host lattice modification using co-doping of Mg 2+ ions
Source: Royal Society of Chemistry journal article supplement (doi:10.1039/d3ra05938c), 2023-01-01
Supplement: d3ra05938c1.pdf [file d3ra05938c1.pdf]

# Electronic supplementary information (ESI)

**Enhanced near infrared-to-visible upconversion in  
CaTiO<sub>3</sub>:Yb<sup>3+</sup>/Er<sup>3+</sup> phosphor via host lattice  
modification using co-doping of Mg<sup>2+</sup> ions**

Neeti Tripathi\*, Kenji Kamada, Hitomi Nakamura, Tomoko Akai

*Nanomaterials Research Institute (NMRI), National Institute of Advanced Industrial Science and  
Technology (AIST), Ikeda, Osaka 563-8577, Japan*

Corresponding author: [n-tripathi@aist.go.jp](mailto:n-tripathi@aist.go.jp)

**Upconversion quantum efficiency measurement and method.** A homemade, optical-microscope (*Olympus IX93*)-based setup was used for measuring upconverted emission spectra and the upconversion efficiencies (UC-QEs) of solid films. The details of the setup were reported elsewhere.<sup>1,2</sup> The setup equipped two-color (785/980 nm) cw laser sources for excitation and an *Ocean Optics USB2000-FLG fiber spectrometer* as a detector. The excitation was designed to irradiated sample uniformly through a 20× objective lens (N.A. = 0.45). The excitation intensity was determined from the incident power divided by the irradiation area calculated with  $e^{-2}$  radius obtained by the spatial beam profile recorded with a COMS camera. The emission from the sample was collected by the same objective lens and transferred to the detector via a multimode optical fiber. A 700-nm short pass filter was used to block the excitation light. To calculate UC-QE ( $\eta_{UC}$ ), which is 100% full scale, we employed the relative method by using the following equation,

$$\eta_{UC} = 2 \Phi_R \frac{F_S (1 - 10^{-A_R}) P_R n_S^2}{F_R (1 - 10^{-A_S}) P_S n_R^2} \approx 2 \Phi_{FL} \frac{F_S A_R P_R n_S^2}{F_R A_S P_S n_R^2}, \quad (S1)$$

where  $F$  is the integrated emission intensity (spectral range 500-700 nm),  $A$  is absorbance,  $P$  is excitation power, and  $n$  is the refractive index of medium. Subscripts of  $S$  and  $R$  means the sample and reference, respectively.  $A$  was determined from the absorption spectrum measured at the same sample position where the emission spectrum measured with the same homemade setup by switching the internal optical paths. The value of  $A$  is smaller than 0.1, so the approximated relation was applied. As for the quantum yield standard  $\Phi_R$ , we used the 100  $\mu$ M solution of fluorescence dye IR-140 (Exciton Inc.) in ethylene glycol (FL-QY = 0.17) sandwiched between microscope slide and cover slip with a fixed-thickness spacer. For the sample, the same cover slip and spacer were used to keep the same configuration between the sample and reference. Though, it was difficult to exclude the scattering by sample grains for emission, tentatively apply refractive index of 1 for the sample is used in the calculation.

1. N. Tripathi, M. Ando, T. Akai, K. Kamada, J. Mater. Chem. C. 2022, 10, 4563.
2. A. Abulikemu, Y. Sakagami, C. Heck, K. Kamada, H. Sotome, H. Miyasaka, D. Kuzuhara, H. Yamada, ACS Appl. Mater. Interfaces. 2019, 11, 20812.

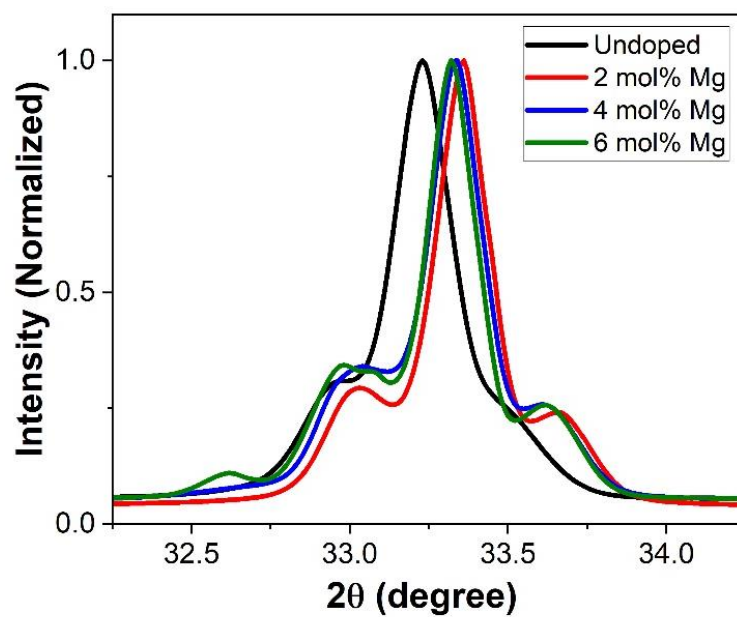

**Figure S1:** XRD peak corresponding to the  $\text{CaTiO}_3$  phase, showing  $2\theta$  shift toward higher angle in  $\text{Mg}^{2+}$  doped  $\text{Ca}_{1-x}\text{Mg}_x\text{TiO}_3:\text{Yb}^{3+}/\text{Er}^{3+}$  samples.

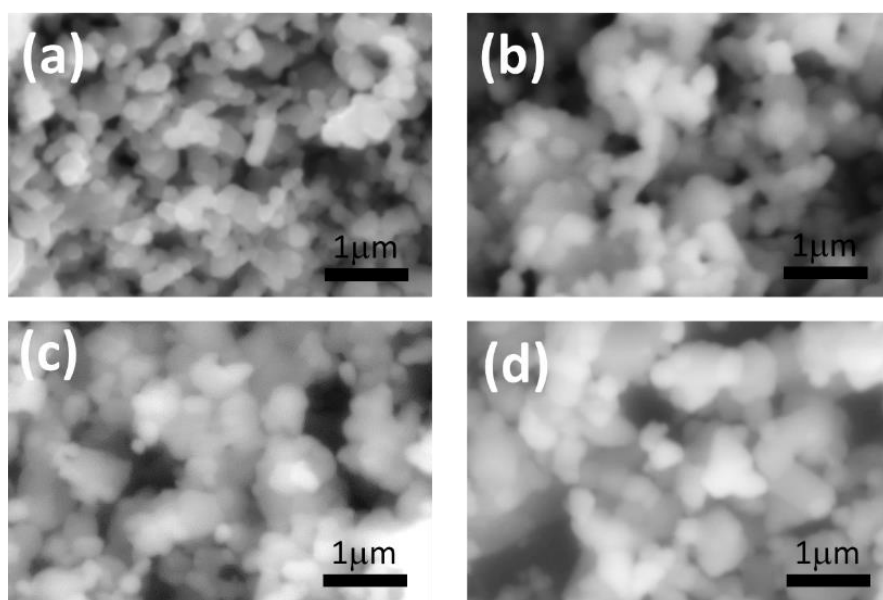

**Figure S2.** SEM micrographs of  $\text{Ca}_{1-x}\text{Mg}_x\text{TiO}_3:\text{Yb}^{3+}/\text{Er}^{3+}$  samples at Mg doping concentration of (a)  $x=0$ , (b)  $x=0.02$  (c)  $x=0.04$ . and (d)  $x=0.06$ .

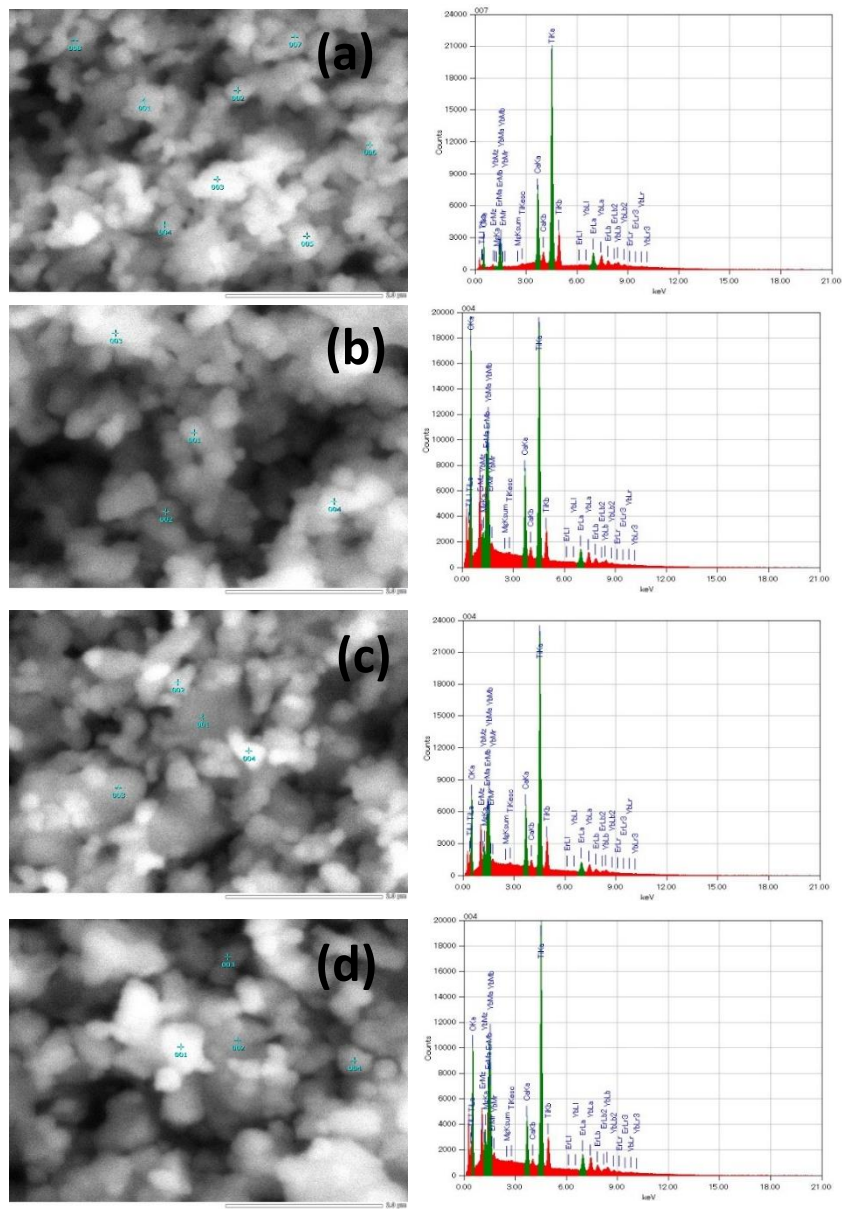

**Figure S3.** EDS spectrum for  $\text{Ca}_{1-x}\text{Mg}_x\text{TiO}_3:\text{Yb}^{3+}/\text{Er}^{3+}$  samples at  $\text{Mg}^{2+}$  doping concentration of (a)  $x = 0$ , (b)  $x = 0.02$  (c)  $x = 0.04$ . and (d)  $x = 0.06$ .

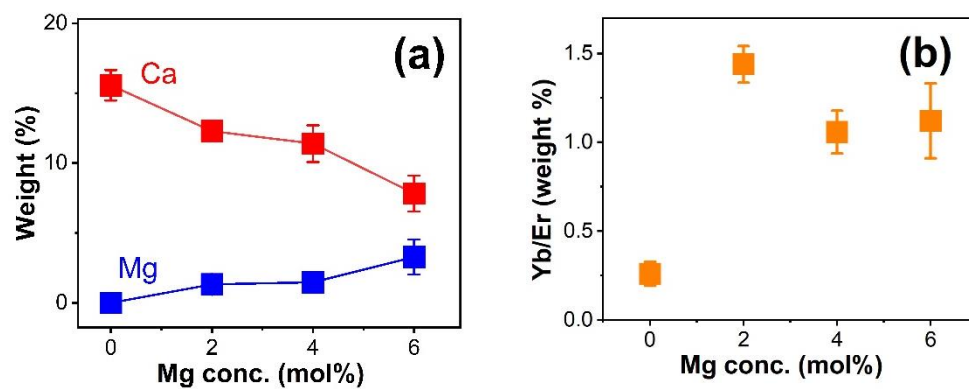

**Figure S4.** Elemental distribution of (a) Ca, Mg and (b) Yb/Er, estimated from of EDS spectrum for  $\text{Ca}_{1-x}\text{Mg}_x\text{TiO}_3:\text{Yb}^{3+}/\text{Er}^{3+}$  samples as a function of  $\text{Mg}^{2+}$  doping concentration.

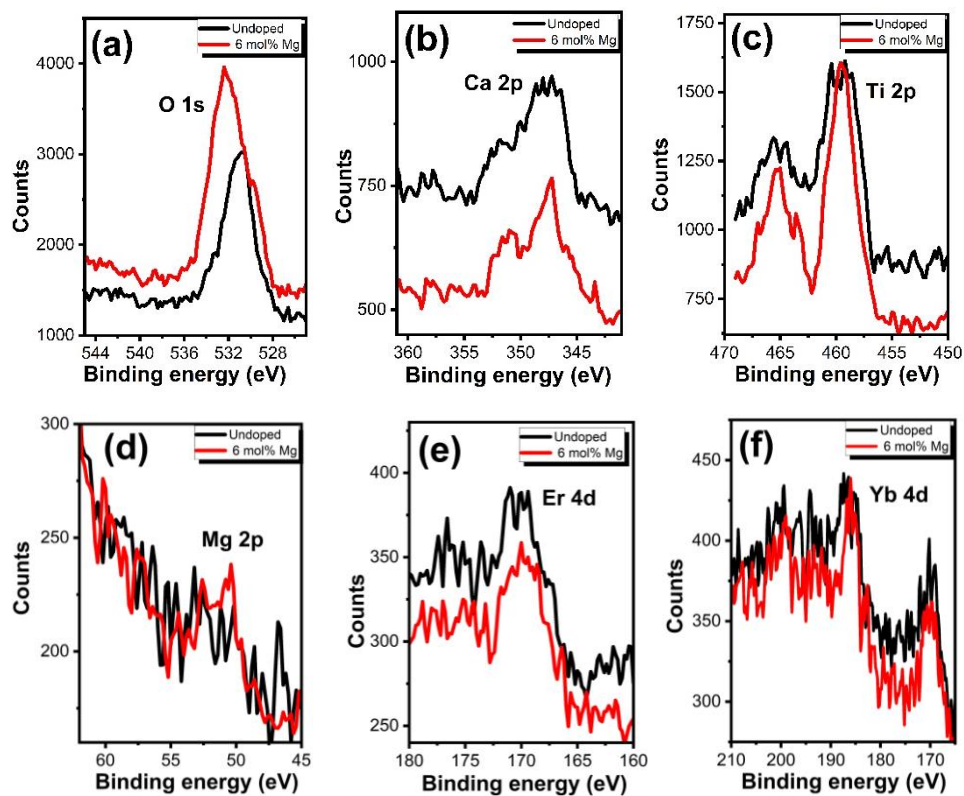

**Figure S5:** XPS spectra for Undoped and 6 mol% Mg doped  $\text{Ca}_{1-x}\text{Mg}_x\text{TiO}_3:\text{Yb}^{3+}/\text{Er}^{3+}$  samples

**Table S1:** Composition estimation from XPS data

| Sample          | Elements    |              |              |              |              |              |
|-----------------|-------------|--------------|--------------|--------------|--------------|--------------|
|                 | O 1s [at.%] | Ca 2p [at.%] | Ti 2p [at.%] | Mg 2p [at.%] | Er 4d [at.%] | Yb 4d [at.%] |
| Undoped         | 33.5        | 2.3          | 8.3          | <0.1         | 0.7          | 4.1          |
| 6 mol% Mg doped | 48.0        | 3.6          | 12.3         | 8.1          | 1.5          | 7.3          |

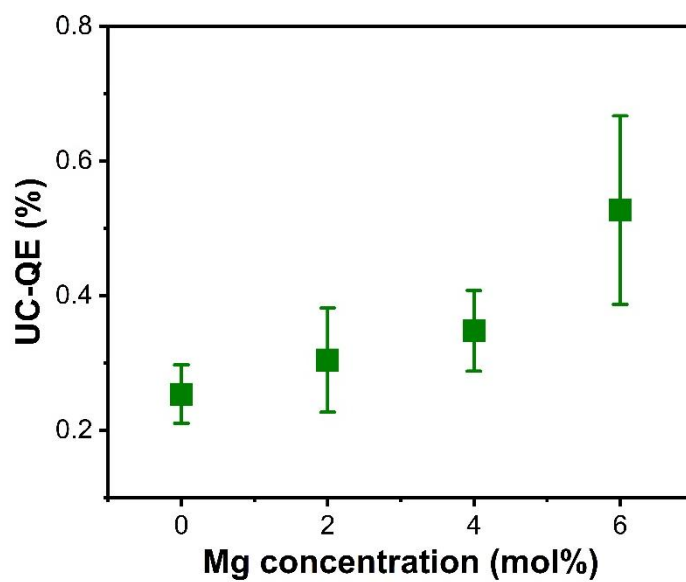

**Figure S6.** Upconversion efficiency graph for  $\text{Ca}_{1-x}\text{Mg}_x\text{TiO}_3:\text{Yb}^{3+}/\text{Er}^{3+}$  samples as a function of  $\text{Mg}^{2+}$  doping concentration, measured at 980 nm excitation (Excitation intensity  $1 \text{ W}\cdot\text{cm}^{-2}$ ).
